# Supplementary material
Source: PubMed Central journal article supplement (PMC8919955)
Supplement: ehp9791.s001.acco.pdf [file ehp9791.s001.acco.pdf]

**Note to readers with disabilities:** *EHP* strives to ensure that all journal content is accessible to all readers. However, some figures and Supplemental Material published in *EHP* articles may not conform to [508 standards](#) due to the complexity of the information being presented. If you need assistance accessing journal content, please contact [ehp508@niehs.nih.gov](mailto:ehp508@niehs.nih.gov). Our staff will work with you to assess and meet your accessibility needs within 3 working days.

### **Supplemental Material**

#### **Per- and Polyfluoroalkyl Substances and Risk of Myocardial Infarction and Stroke: A Nested Case–Control Study in Sweden**

Tessa Schillemans, Carolina Donat-Vargas, Christian H. Lindh, Ulf de Faire, Alicja Wolk, Karin Leander, and Agneta Åkesson

#### **Table of Contents**

**Table S1.** Limit of detection (LOD) and between-run precision. Concentrations and coefficient of variation (CV) in three quality control (QC) samples n=31.

**Table S2.** Between-run precision of two reference samples originating from participation in the HBM4EU program and prepared as quality controls (QC). Concentrations, expected concentrations and coefficient of variation (CV) in n=31 repeated analysis are shown.

**Table S3.** Baseline (2003-2009 and 1997-1999, respectively) characteristics by myocardial infarction (MI) case-control status of 398 women from the Swedish Mammography Cohort-Clinical and of 422 men and women from the Swedish 60 year-old cohort.

**Table S4.** Baseline (2003-2009 and 1997-1999, respectively) characteristics by stroke case-control status of 344 women from the Swedish Mammography Cohort-Clinical and of 364 men and women from the Swedish 60 year-old cohort.

**Table S5.** Multivariable-adjusted cross-sectional associations in controls between baseline PFAS plasma concentrations and total cholesterol, LDL, HDL and triglycerides in 631 men and women from two pooled Swedish cohorts, estimated using linear mixed effects models – PFHpA and PFOA results are from 60YO cohort alone.

**Table S6.** Results for interactions with BMI in multivariable-adjusted cross-sectional associations in controls between baseline PFAS plasma concentrations and total cholesterol, LDL, HDL and triglycerides of two pooled Swedish cohorts, estimated using linear mixed effects models as well as in multivariable-adjusted prospective associations between baseline PFAS plasma concentrations and cardiovascular disease (CVD) risk of two pooled Swedish cohorts, estimated using conditional logistic regression – PFHpA and PFOA results are from 60YO cohort alone.

**Table S7.** Multivariable-adjusted prospective associations between baseline PFAS plasma concentrations and subsequent risk of cardiovascular disease (CVD), estimated in SMC-C and 60YO cohorts using conditional logistic regression – PFHpA and PFOA results are from 60YO cohort alone.

**Table S8.** Multivariable-adjusted prospective associations between baseline PFAS plasma concentrations and subsequent risk of myocardial infarction (MI), estimated in SMC-C and 60YO cohorts using conditional logistic regression – PFHpA and PFOA results are from 60YO cohort alone.

**Table S9.** Multivariable-adjusted prospective associations between baseline PFAS plasma concentrations and subsequent risk of stroke, estimated in SMC-C and 60YO cohorts using conditional logistic regression – PFHpA and PFOA results are from 60YO cohort alone.

**Figure S1.** Pairwise Spearman's rank correlations between different PFAS at baseline using both cohorts (SMC-C and 60YO), except for PFHpA and PFOA which were derived using the 60YO cohort alone. Abbreviations: **PFHxS**, perfluorohexane sulfonic acid; **PFHpA**, perfluoroheptanoic acid; **PFOS**, perfluorooctane sulfonate; **PFOA**, perfluorooctanoic acid; **PFNA**, perfluorononanoic acid; **PFDA**, perfluorodecanoic acid; **PFUnDA**, perfluoroundecanoic acid.

**Figure S2.** Multivariable-adjusted cross-sectional associations in controls of two Swedish pooled cohorts (SMC-C baseline: 2003-2009 and 60YO baseline: 1997-1999) between baseline PFAS plasma concentrations and a) LDL in pooled cohorts, estimated using linear mixed effects models stratified by BMI (lean: n=253, overweight: n=373) and b) apoB in the 60YO, estimated using a linear regression stratified by BMI (lean: n=105, overweight: n=200). PFHpA and PFOA are from 60YO cohort alone. Adjusted  $\beta$ -coefficients ( $\pm 95\%$  CIs, mmol/L) of blood lipids are presented by 1-SD increment in natural log-transformed plasma PFAS concentrations (ng/mL). Models are adjusted for age, sex, sampling date, education, diabetes, hypertension, family history of CVD, smoking habits, physical activity and healthy diet score. Individual PFAS were standardized (rescaled with mean=0 and SD=1) and summed ( $\Sigma$  PFAS). PFHpA and PFOA which were derived using the 60YO cohort alone. Abbreviations: **PFOS**, perfluorooctane sulfonate; **PFNA**, perfluorononanoic acid; **PFDA**, perfluorodecanoic acid; **PFUnDA**, perfluoroundecanoic acid.

**Appendix S1.** Certificate quality control PFAS measurements (University of Erlangen-Nuremberg, Germany).

**Appendix S2.** Certificate quality control PFAS measurements (HBM4EU).

**Table S1.** Limit of detection (LOD) and between-run precision. Concentrations and coefficient of variation (CV) in three quality control (QC) samples n=31.

| Compound | LOD<br>(µg/L) | QC1<br>(µg/L) | CV<br>QC1 (%) | QC2<br>(µg/L) | CV<br>QC2 (%) | QC3<br>(µg/L) | CV<br>QC3 (%) |
|----------|---------------|---------------|---------------|---------------|---------------|---------------|---------------|
| PFHpA    | 0.01          | 0.5           | 10            | 2.1           | 9             | 20            | 6             |
| PFOA     | 0.09          | 2.7           | 7             | 4.6           | 9             | 21            | 10            |
| PFNA     | 0.02          | 1.7           | 7             | 3.3           | 6             | 19            | 5             |
| PFDA     | 0.03          | 1.1           | 6             | 2.7           | 7             | 19            | 5             |
| PFUnDA   | 0.03          | 1.2           | 7             | 2.7           | 5             | 19            | 5             |
| PFHxS    | 0.02          | 1.7           | 7             | 3.3           | 6             | 19            | 5             |
| PFOS     | 0.06          | 11            | 7             | 12            | 4             | 18            | 2             |

**Table S2.** Between-run precision of two reference samples originating from participation in the HBM4EU program and prepared as quality controls (QC). Concentrations, expected concentrations and coefficient of variation (CV) in n=31 repeated analysis are shown.

| Compound | QC 1 HBM4EU<br>(µg/L) | Expected<br>HBM4EU 1<br>(µg/L) | CV<br>(%) | QC 2<br>HBM4EU<br>(µg/L) | Expected<br>HBM4EU 2<br>(µg/L) | CV<br>(%) |
|----------|-----------------------|--------------------------------|-----------|--------------------------|--------------------------------|-----------|
| PFHpA    | 0.56                  | 0.59                           | 9         | 0.24                     | 0.25                           | 14        |
| PFOA     | 4.8                   | 5.0                            | 7         | 0.93                     | 1.1                            | 8         |
| PFNA     | 0.75                  | 0.88                           | 7         | 0.43                     | 0.48                           | 8         |
| PFDA     | 0.80                  | 0.77                           | 6         | 0.42                     | 0.43                           | 9         |
| PFUnDA   | 0.52                  | 0.53                           | 5         | 0.30                     | 0.32                           | 9         |
| PFHxS    | 0.75                  | 0.88                           | 7         | 0.43                     | 0.48                           | 8         |
| PFOS     | 5.2                   | 5.5                            | 4         | 1.7                      | 1.9                            | 7         |

**Table S3.** Baseline (2003-2009 and 1997-1999, respectively) characteristics by myocardial infarction (MI) case-control status of 398 women from the Swedish Mammography Cohort-Clinical and of 422 men and women from the Swedish 60 year-old cohort.

| Continuous: Mean (SD)<br>Categorical: Proportion (n) | SMC-C cohort                         |                   | 60YO cohort                          |                   |
|------------------------------------------------------|--------------------------------------|-------------------|--------------------------------------|-------------------|
|                                                      | Myocardial infarction cases<br>n=134 | Controls<br>n=264 | Myocardial infarction cases<br>n=211 | Controls<br>n=211 |
| <b>Characteristics</b>                               |                                      |                   |                                      |                   |
| Sex, %(n)                                            |                                      |                   |                                      |                   |
| Female                                               | 100 (134)                            | 100 (264)         | 32 (67)                              | 32 (67)           |
| Male                                                 | 0 (0)                                | 0 (0)             | 68 (144)                             | 68 (144)          |
| Age, y                                               | 72 (7.5)                             | 72 (7.4)          | 61 (0.1)                             | 61 (0.1)          |
| Sample year                                          | 2006 (1.5)                           | 2006 (1.5)        | 1998 (0.4)                           | 1998 (0.3)        |
| Education, %(n)                                      |                                      |                   |                                      |                   |
| <12 yrs                                              | 70 (94)                              | 69 (182)          | 76 (152)                             | 64 (130)          |
| ≥12 yrs                                              | 30 (40)                              | 31 (82)           | 24 (47)                              | 36 (72)           |
| Missing, n                                           | 0                                    | 0                 | 12                                   | 9                 |
| Body mass index, kg/m <sup>2</sup>                   | 27 (4.7)                             | 26 (4.5)          | 28 (4.1)                             | 27 (4.0)          |
| History diabetes, %(n)                               |                                      |                   |                                      |                   |
| No                                                   | 93 (125)                             | 97 (256)          | 89 (187)                             | 95 (200)          |
| Yes                                                  | 6.7 (9)                              | 3.0 (8)           | 11 (24)                              | 5.2 (11)          |
| History hypertension, %(n)                           |                                      |                   |                                      |                   |
| No                                                   | 49 (65)                              | 61 (160)          | 53 (111)                             | 64 (135)          |
| Yes                                                  | 51 (69)                              | 39 (104)          | 47 (100)                             | 36 (76)           |
| History high cholesterol, %(n)                       |                                      |                   |                                      |                   |
| No                                                   | 78 (104)                             | 78 (207)          | 93 (196)                             | 91 (191)          |
| Yes                                                  | 22 (30)                              | 22 (57)           | 7.1 (15)                             | 9.5 (20)          |
| Family history CVD, %(n)                             |                                      |                   |                                      |                   |
| No                                                   | 59 (79)                              | 63 (166)          | 55 (117)                             | 57 (120)          |
| Yes                                                  | 41 (55)                              | 37 (98)           | 45 (94)                              | 43 (91)           |
| Smoking status, %(n)                                 |                                      |                   |                                      |                   |
| Never                                                | 46 (59)                              | 58 (144)          | 29 (57)                              | 46 (91)           |
| Former                                               | 34 (44)                              | 33 (83)           | 35 (69)                              | 39 (78)           |
| Current                                              | 20 (25)                              | 9 (23)            | 36 (71)                              | 16 (31)           |
| Missing, n                                           | 6                                    | 14                | 14                                   | 11                |
| Physical activity, %(n)                              |                                      |                   |                                      |                   |
| Active                                               | 29 (32)                              | 32 (72)           | 26 (51)                              | 33 (67)           |
| Inactive                                             | 71 (77)                              | 68 (152)          | 74 (142)                             | 67 (138)          |
| Missing, n                                           | 25                                   | 40                | 18                                   | 6                 |
| Healthy diet score, %(n)                             |                                      |                   |                                      |                   |
| Unhealthy                                            | 25 (33)                              | 15 (39)           | 44 (87)                              | 31 (63)           |
| Moderately healthy                                   | 58 (75)                              | 59 (150)          | 33 (65)                              | 35 (71)           |
| Healthy                                              | 17 (22)                              | 25 (64)           | 24 (47)                              | 35 (71)           |
| Missing, n                                           | 4                                    | 11                | 12                                   | 6                 |
| <b>Lipid measurements (mmol/L)</b>                   |                                      |                   |                                      |                   |
| Total cholesterol                                    | 5.82 (0.94)                          | 5.79 (1.01)       | 6.14 (1.1)                           | 5.89 (1.0)        |
| LDL                                                  | 3.59 (0.91)                          | 3.50 (0.90)       | 4.12 (0.90)                          | 3.90 (0.93)       |
| HDL                                                  | 1.44 (0.35)                          | 1.56 (0.37)       | 1.31 (0.37)                          | 1.40 (0.39)       |
| Triglycerides                                        | 1.49 (0.68)                          | 1.32 (0.62)       | 1.57 (0.98)                          | 1.33 (0.81)       |
| ApoB <sup>a</sup>                                    |                                      |                   | 1.2 (0.2)                            | 1.1 (0.2)         |
| ApoA1 <sup>a</sup>                                   |                                      |                   | 1.4 (0.3)                            | 1.5 (0.3)         |
| <b>PFAS concentrations (ng/mL)</b>                   |                                      |                   |                                      |                   |
| Mean ± SD and median (IQR)                           |                                      |                   |                                      |                   |
| PFHxS                                                | 5.2 ± 9.8                            | 5.9 ± 7.1         | 3.1 ± 3.7                            | 3.2 ± 4.7         |
| Median (IQR)                                         | 2.52 (2.0,3.4)                       | 2.78 (2.0,6.6)    | 2.4 (1.9,3.0)                        | 2.3 (1.9,2.9)     |
| PFHpA <sup>a</sup>                                   |                                      |                   | 0.078 ± 0.11                         | 0.083 ± 0.091     |
| Median (IQR)                                         |                                      |                   | 0.05 (0.03,0.09)                     | 0.06 (0.04,0.1)   |

|                   |                  |                   |                  |                  |
|-------------------|------------------|-------------------|------------------|------------------|
| PFOS              | 17.1 ± 10.9      | 19.2 ± 19.8       | 26.6 ± 12.8      | 27.5 ± 11.9      |
| Median (IQR)      | 16.2 (11.2,20.4) | 17.09 (12.6,21.8) | 24.9 (20.2,31.4) | 25.0 (18.9,34.2) |
| PFOA <sup>a</sup> |                  |                   | 5.7 ± 3.8        | 5.8 ± 3.1        |
| Median (IQR)      |                  |                   | 5.1 (3.9,6.5)    | 5.3 (4.0,6.8)    |
| PFNA              | 0.90 ± 0.40      | 1.0 ± 0.5         | 0.74 ± 0.40      | 0.80 ± 0.44      |
| Median (IQR)      | 0.86 (0.62,1.1)  | 0.94 (0.7,1.2)    | 0.7 (0.5,0.9)    | 0.7 (0.5,1.0)    |
| PFDA              | 0.36 ± 0.16      | 0.43 ± 0.24       | 0.27 ± 0.14      | 0.30 ± 0.17      |
| Median (IQR)      | 0.34 (0.24,0.46) | 0.37 (0.29,0.5)   | 0.25 (0.2,0.3)   | 0.25 (0.2,0.4)   |
| PFUnDA            | 0.29 ± 0.15      | 0.35 ± 0.20       | 0.25 ± 0.14      | 0.29 ± 0.18      |
| Median (IQR)      | 0.25 (0.19,0.36) | 0.31 (0.2,0.44)   | 0.22 (0.2,0.3)   | 0.23 (0.2,0.4)   |

Note: Continuous variables are shown as mean (standard deviation) if not otherwise stated. PFAS concentrations are presented as medians and interquartile ranges.

<sup>a</sup> Available for the 60YO cohort alone.

Abbreviations: **PFHxS**, perfluorohexane sulfonic acid; **PFHpA**, perfluoroheptanoic acid; **PFOS**, perfluorooctane sulfonate; **PFOA**, perfluorooctanoic acid; **PFNA**, perfluorononanoic acid; **PFDA**, perfluorodecanoic acid; **PFUnDA**, perfluoroundecanoic acid.

**Table S4.** Baseline (2003-2009 and 1997-1999, respectively) characteristics by stroke case-control status of 344 women from the Swedish Mammography Cohort-Clinical and of 364 men and women from the Swedish 60 year-old cohort.

| Continuous: Mean (SD)<br>Categorical: Proportion (n) | SMC-C cohort                   |                   | 60YO cohort                    |                   |
|------------------------------------------------------|--------------------------------|-------------------|--------------------------------|-------------------|
|                                                      | Ischemic stroke cases<br>n=172 | Controls<br>n=172 | Ischemic stroke cases<br>n=182 | Controls<br>n=182 |
| <b>Characteristics</b>                               |                                |                   |                                |                   |
| Sex, %(n)                                            |                                |                   |                                |                   |
| Female                                               | 100 (172)                      | 100 (172)         | 41 (74)                        | 41 (74)           |
| Male                                                 | 0 (0)                          | 0 (0)             | 108 (59)                       | 108 (59)          |
| Age, y                                               | 72 (7.2)                       | 72 (7.2)          | 61 (0.1)                       | 61 (0.1)          |
| Sample year                                          | 2006 (1.5)                     | 2006 (1.5)        | 1998 (0.4)                     | 1998 (0.3)        |
| Education, %(n)                                      |                                |                   |                                |                   |
| <12 yrs                                              | 69 (118)                       | 67 (114)          | 81 (137)                       | 70 (124)          |
| ≥12 yrs                                              | 31 (53)                        | 33 (56)           | 19 (32)                        | 30 (53)           |
| Missing, n                                           | 1                              | 2                 | 13                             | 5                 |
| Body mass index, kg/m <sup>2</sup>                   | 27 (4.5)                       | 26 (4.2)          | 27 (4.5)                       | 28 (4.5)          |
| History diabetes, %(n)                               |                                |                   |                                |                   |
| No                                                   | 97 (167)                       | 98 (168)          | 93 (169)                       | 93 (170)          |
| Yes                                                  | 2.9 (5)                        | 2.3 (4)           | 7.1 (13)                       | 6.6 (12)          |
| History hypertension, %(n)                           |                                |                   |                                |                   |
| No                                                   | 47 (81)                        | 56 (97)           | 48 (87)                        | 59 (108)          |
| Yes                                                  | 53 (91)                        | 44 (75)           | 52 (95)                        | 41 (74)           |
| History high cholesterol, %(n)                       |                                |                   |                                |                   |
| No                                                   | 68 (117)                       | 75 (129)          | 93 (169)                       | 89 (162)          |
| Yes                                                  | 32 (55)                        | 25 (43)           | 7.1 (13)                       | 11 (20)           |
| Family history CVD, %(n)                             |                                |                   |                                |                   |
| No                                                   | 65 (112)                       | 66 (114)          | 58 (105)                       | 55 (100)          |
| Yes                                                  | 35 (60)                        | 34 (58)           | 42 (77)                        | 45 (82)           |
| Smoking status, %(n)                                 |                                |                   |                                |                   |
| Never                                                | 57 (93)                        | 62 (105)          | 30 (51)                        | 46 (81)           |
| Former                                               | 29 (48)                        | 30 (50)           | 39 (66)                        | 37 (66)           |
| Current                                              | 14 (22)                        | 8 (14)            | 31 (52)                        | 17 (30)           |
| Missing, n                                           | 9                              | 3                 | 13                             | 5                 |
| Physical activity, %(n)                              |                                |                   |                                |                   |
| Active                                               | 31 (45)                        | 33 (48)           | 30 (49)                        | 34 (60)           |
| Inactive                                             | 67 (98)                        | 67 (97)           | 70 (115)                       | 66 (117)          |
| Missing, n                                           | 29                             | 27                | 18                             | 5                 |
| Healthy diet score, %(n)                             |                                |                   |                                |                   |
| Unhealthy                                            | 18 (29)                        | 10 (17)           | 35 (59)                        | 36 (64)           |
| Moderately healthy                                   | 64 (105)                       | 64 (106)          | 38 (65)                        | 30 (53)           |
| Healthy                                              | 19 (31)                        | 25 (42)           | 27 (45)                        | 34 (61)           |
| Missing, n                                           | 7                              | 7                 | 13                             | 4                 |
| <b>Lipid measurements (mmol/L)</b>                   |                                |                   |                                |                   |
| Total cholesterol                                    | 5.80 (1.19)                    | 5.78 (1.10)       | 5.94 (0.96)                    | 5.93 (1.03)       |
| LDL                                                  | 3.45 (1.03)                    | 3.51 (1.02)       | 3.87 (0.85)                    | 3.9 (0.92)        |
| HDL                                                  | 1.55 (0.44)                    | 1.57 (0.35)       | 1.39 (0.37)                    | 1.42 (0.39)       |
| Triglycerides                                        | 1.46 (0.74)                    | 1.28 (0.61)       | 1.54 (1.00)                    | 1.39 (1.00)       |
| ApoB <sup>a</sup>                                    |                                |                   | 1.1 (0.2)                      | 1.1 (0.2)         |
| ApoA1 <sup>a</sup>                                   |                                |                   | 1.5 (0.3)                      | 1.5 (0.3)         |
| <b>PFAS concentrations (ng/mL)</b>                   |                                |                   |                                |                   |
| Mean ± SD and median (IQR)                           |                                |                   |                                |                   |
| PFHxS                                                | 5.4 ± 5.9                      | 6.0 ± 8.4         | 3.3 ± 5.4                      | 3.8 ± 8.0         |
| Median (IQR)                                         | 2.82 (2.2,5.6)                 | 2.68 (2.1,5.1)    | 2.3 (1.7,2.9)                  | 2.4 (1.8,2.9)     |
| PFHpA <sup>a</sup>                                   |                                |                   | 0.08 ± 0.07                    | 0.08 ± 0.07       |
| Median (IQR)                                         |                                |                   | 0.06 (0.03,0.09)               | 0.06 (0.03,0.11)  |

|                   |                  |                  |                  |                  |
|-------------------|------------------|------------------|------------------|------------------|
| PFOS              | 19.4 ± 10.0      | 19.2 ± 13.5      | 26.2 ± 13.7      | 28.3 ± 17.8      |
| Median (IQR)      | 17.8 (12.9,23.8) | 16.4 (12.5,21.8) | 24.4 (17.8,30.9) | 25.5 (19.1,34.9) |
| PFOA <sup>a</sup> |                  |                  | 5.5 ± 2.95       | 6.1 ± 4.7)       |
| Median (IQR)      |                  |                  | 5.0 (3.8,6.7)    | 5.4 (3.9,7.0)    |
| PFNA              | 1.1 ± 0.58       | 1.0 ± 0.45       | 0.74 ± 0.38      | 0.81 ± 0.41      |
| Median (IQR)      | 1.0 (0.70,1.3)   | 0.91 (0.75,1.2)  | 0.68 (0.47,0.92) | 0.73 (0.49,1.0)  |
| PFDA              | 0.43 ± 0.23      | 0.44 ± 0.22      | 0.28 ± 0.16      | 0.30 ± 0.16      |
| Median (IQR)      | 0.38 (0.28,0.49) | 0.39 (0.29,0.53) | 0.25 (0.19,0.35) | 0.27 (0.19,0.4)  |
| PFUnDA            | 0.35 ± 0.21      | 0.37 ± 0.21      | 0.26 ± 0.15      | 0.29 ± 0.17      |
| Median (IQR)      | 0.28 (0.20,0.44) | 0.31 (0.23,0.46) | 0.22 (0.16,0.32) | 0.25 (0.17,0.36) |

Note: Continuous variables are shown as mean (standard deviation) if not otherwise stated. PFAS concentrations are presented as medians and interquartile ranges.

<sup>a</sup> Available for the 60YO cohort alone.

Abbreviations: **PFHxS**, perfluorohexane sulfonic acid; **PFHpA**, perfluoroheptanoic acid; **PFOS**, perfluorooctane sulfonate; **PFOA**, perfluorooctanoic acid; **PFNA**, perfluorononanoic acid; **PFDA**, perfluorodecanoic acid; **PFUnDA**, perfluoroundecanoic acid.

**Table S5.** Multivariable-adjusted cross-sectional associations in controls between baseline PFAS plasma concentrations and total cholesterol, LDL, HDL and triglycerides in 631 men and women from two pooled Swedish cohorts, estimated using linear mixed effects models – PFHpA and PFOA results are from 60YO cohort alone.

|                                                                                                                     | Model 1             |                     |                     | Model 2             |                     |                     |
|---------------------------------------------------------------------------------------------------------------------|---------------------|---------------------|---------------------|---------------------|---------------------|---------------------|
|                                                                                                                     | Tertile 2           | Tertile 3           | 1-SD increase       | Tertile 2           | Tertile 3           | 1-SD increase       |
| <b>Mean differences in total cholesterol (<math>\beta</math>-coefficient <math>\pm</math>95% CI, mmol/L), n=631</b> |                     |                     |                     |                     |                     |                     |
| $\Sigma$ PFAS                                                                                                       | 0.14 (-0.04,0.33)   | 0.32 (0.13,0.50)    | 0.04 (0.01,0.06)    | 0.16 (-0.03,0.35)   | 0.34 (0.15,0.53)    | 0.04 (0.01,0.06)    |
| PFHxS                                                                                                               | 0.06 (-0.13,0.26)   | 0.08 (-0.11,0.27)   | 0.04 (-0.04,0.11)   | 0.08 (-0.11,0.27)   | 0.08 (-0.11,0.27)   | 0.03 (-0.04,0.11)   |
| PFHpA <sup>a</sup>                                                                                                  | -0.03 (-0.30,0.25)  | 0.12 (-0.16,0.40)   | 0.02 (-0.09,0.14)   | -0.09 (-0.38,0.20)  | 0.09 (-0.20,0.38)   | 0.02 (-0.10,0.14)   |
| PFOS                                                                                                                | 0.16 (-0.02,0.35)   | 0.34 (0.15,0.53)    | 0.15 (0.07,0.23)    | 0.16 (-0.02,0.35)   | 0.31 (0.11,0.50)    | 0.14 (0.06,0.22)    |
| PFOA <sup>a</sup>                                                                                                   | 0.07 (-0.21,0.35)   | 0.23 (-0.05,0.51)   | 0.08 (-0.03,0.20)   | 0.07 (-0.22,0.35)   | 0.22 (-0.07,0.51)   | 0.07 (-0.05,0.19)   |
| PFNA                                                                                                                | 0.14 (-0.05,0.33)   | 0.31 (0.12,0.50)    | 0.11 (0.04,0.19)    | 0.16 (-0.03,0.34)   | 0.33 (0.13,0.52)    | 0.12 (0.04,0.20)    |
| PFDA                                                                                                                | 0.21 (0.02,0.39)    | 0.33 (0.14,0.51)    | 0.14 (0.07,0.22)    | 0.21 (0.03,0.40)    | 0.35 (0.16,0.54)    | 0.15 (0.07,0.23)    |
| PFUnDA                                                                                                              | 0.22 (0.04,0.41)    | 0.37 (0.19,0.56)    | 0.17 (0.09,0.25)    | 0.21 (0.03,0.40)    | 0.37 (0.18,0.57)    | 0.17 (0.10,0.25)    |
| <b>Mean differences in LDL (<math>\beta</math>-coefficient <math>\pm</math>95% CI, mmol/L), n=626</b>               |                     |                     |                     |                     |                     |                     |
| $\Sigma$ PFAS                                                                                                       | 0.16 (-0.01,0.33)   | 0.23 (0.07,0.40)    | 0.02 (0.00,0.04)    | 0.16 (-0.01,0.33)   | 0.26 (0.09,0.43)    | 0.02 (0.00,0.04)    |
| PFHxS                                                                                                               | 0.04 (-0.14,0.21)   | 0.03 (-0.14,0.20)   | 0.03 (-0.04,0.10)   | 0.06 (-0.11,0.24)   | 0.05 (-0.12,0.22)   | 0.03 (-0.04,0.10)   |
| PFHpA <sup>a</sup>                                                                                                  | -0.04 (-0.29,0.21)  | 0.13 (-0.13,0.38)   | 0.01 (-0.09,0.11)   | -0.11 (-0.37,0.15)  | 0.09 (-0.17,0.36)   | 0.00 (-0.11,0.11)   |
| PFOS                                                                                                                | 0.13 (-0.03,0.30)   | 0.26 (0.10,0.43)    | 0.12 (0.05,0.19)    | 0.14 (-0.03,0.31)   | 0.28 (0.11,0.46)    | 0.13 (0.06,0.20)    |
| PFOA <sup>a</sup>                                                                                                   | -0.02 (-0.27,0.23)  | 0.10 (-0.15,0.36)   | 0.03 (-0.07,0.14)   | -0.02 (-0.28,0.24)  | 0.11 (-0.15,0.38)   | 0.03 (-0.08,0.14)   |
| PFNA                                                                                                                | 0.15 (-0.01,0.32)   | 0.25 (0.08,0.42)    | 0.08 (0.01,0.15)    | 0.15 (-0.02,0.32)   | 0.25 (0.08,0.43)    | 0.09 (0.02,0.16)    |
| PFDA                                                                                                                | 0.22 (0.05,0.39)    | 0.25 (0.08,0.42)    | 0.10 (0.03,0.17)    | 0.22 (0.05,0.39)    | 0.27 (0.09,0.44)    | 0.10 (0.03,0.17)    |
| PFUnDA                                                                                                              | 0.22 (0.05,0.39)    | 0.23 (0.07,0.40)    | 0.12 (0.05,0.19)    | 0.21 (0.04,0.38)    | 0.24 (0.07,0.42)    | 0.12 (0.05,0.19)    |
| <b>Mean differences in HDL (<math>\beta</math>-coefficient <math>\pm</math>95% CI, mmol/L), n=631</b>               |                     |                     |                     |                     |                     |                     |
| $\Sigma$ PFAS                                                                                                       | 0.06 (-0.01,0.12)   | 0.16 (0.09,0.22)    | 0.02 (0.02,0.03)    | 0.06 (-0.00,0.13)   | 0.14 (0.07,0.20)    | 0.02 (0.01,0.03)    |
| PFHxS                                                                                                               | 0.03 (-0.03,0.10)   | 0.08 (0.01,0.15)    | 0.01 (-0.02,0.04)   | 0.01 (-0.05,0.08)   | 0.05 (-0.02,0.11)   | 0.00 (-0.02,0.03)   |
| PFHpA <sup>a</sup>                                                                                                  | 0.01 (-0.08,0.11)   | 0.05 (-0.05,0.14)   | 0.03 (-0.01,0.07)   | 0.02 (-0.07,0.11)   | 0.07 (-0.02,0.16)   | 0.04 (0.00,0.08)    |
| PFOS                                                                                                                | 0.08 (0.01,0.15)    | 0.12 (0.05,0.19)    | 0.05 (0.02,0.08)    | 0.09 (0.03,0.16)    | 0.11 (0.04,0.17)    | 0.05 (0.02,0.08)    |
| PFOA <sup>a</sup>                                                                                                   | 0.13 (0.04,0.22)    | 0.18 (0.09,0.28)    | 0.06 (0.02,0.10)    | 0.11 (0.03,0.20)    | 0.15 (0.06,0.24)    | 0.05 (0.01,0.09)    |
| PFNA                                                                                                                | 0.01 (-0.05,0.08)   | 0.12 (0.05,0.18)    | 0.06 (0.03,0.08)    | 0.03 (-0.03,0.10)   | 0.12 (0.06,0.19)    | 0.06 (0.03,0.08)    |
| PFDA                                                                                                                | 0.05 (-0.01,0.12)   | 0.18 (0.11,0.24)    | 0.09 (0.06,0.11)    | 0.06 (-0.01,0.12)   | 0.16 (0.10,0.23)    | 0.08 (0.06,0.11)    |
| PFUnDA                                                                                                              | 0.07 (0.01,0.14)    | 0.23 (0.17,0.30)    | 0.09 (0.07,0.12)    | 0.06 (-0.01,0.12)   | 0.20 (0.14,0.27)    | 0.08 (0.06,0.11)    |
| <b>Mean differences in triglycerides (<math>\beta</math>-coefficient <math>\pm</math>95% CI, mmol/L), n=631</b>     |                     |                     |                     |                     |                     |                     |
| $\Sigma$ PFAS                                                                                                       | -0.20 (-0.35,-0.06) | -0.27 (-0.42,-0.13) | -0.03 (-0.05,-0.02) | -0.21 (-0.35,-0.07) | -0.24 (-0.38,-0.10) | -0.03 (-0.04,-0.01) |
| PFHxS                                                                                                               | -0.13 (-0.28,0.01)  | -0.17 (-0.32,-0.03) | -0.03 (-0.09,0.03)  | -0.12 (-0.26,0.03)  | -0.14 (-0.28,0.00)  | -0.02 (-0.08,0.04)  |
| PFHpA <sup>a</sup>                                                                                                  | 0.07 (-0.18,0.33)   | 0.01 (-0.25,0.28)   | 0.00 (-0.10,0.11)   | 0.01 (-0.25,0.28)   | -0.06 (-0.32,0.21)  | -0.03 (-0.14,0.08)  |
| PFOS                                                                                                                | -0.22 (-0.36,-0.08) | -0.27 (-0.41,-0.12) | -0.12 (-0.18,-0.06) | -0.21 (-0.35,-0.07) | -0.23 (-0.37,-0.08) | -0.11 (-0.17,-0.05) |



|                                                                                                         |                     |                     |                     |                     |                     |                     |
|---------------------------------------------------------------------------------------------------------|---------------------|---------------------|---------------------|---------------------|---------------------|---------------------|
| PFOA <sup>a</sup>                                                                                       | -0.14 (-0.40,0.12)  | -0.24 (-0.50,0.03)  | -0.07 (-0.17,0.04)  | -0.15 (-0.41,0.11)  | -0.22 (-0.48,0.04)  | -0.06 (-0.17,0.05)  |
| PFNA                                                                                                    | -0.11 (-0.25,0.04)  | -0.20 (-0.35,-0.06) | -0.10 (-0.16,-0.04) | -0.11 (-0.26,0.03)  | -0.20 (-0.35,-0.06) | -0.09 (-0.15,-0.03) |
| PFDA                                                                                                    | -0.19 (-0.33,-0.04) | -0.32 (-0.47,-0.18) | -0.14 (-0.20,-0.09) | -0.18 (-0.32,-0.04) | -0.30 (-0.44,-0.16) | -0.13 (-0.19,-0.07) |
| PFUnDA                                                                                                  | -0.19 (-0.33,-0.05) | -0.31 (-0.45,-0.16) | -0.15 (-0.21,-0.09) | -0.15 (-0.29,-0.00) | -0.26 (-0.40,-0.11) | -0.12 (-0.18,-0.06) |
| <b>Mean differences in apoB (<math>\beta</math>-coefficient <math>\pm</math>95% CI, mmol/L), n=305</b>  |                     |                     |                     |                     |                     |                     |
| $\Sigma$ PFAS <sup>a</sup>                                                                              | 0.02 (-0.04,0.08)   | 0.00 (-0.06,0.06)   | 0.00 (-0.00,0.01)   | 0.03 (-0.04,0.09)   | 0.01 (-0.05,0.08)   | 0.00 (-0.00,0.01)   |
| PFHxS <sup>a</sup>                                                                                      | -0.01 (-0.07,0.05)  | -0.03 (-0.09,0.03)  | -0.01 (-0.04,0.02)  | -0.00 (-0.07,0.06)  | -0.02 (-0.08,0.04)  | -0.01 (-0.04,0.02)  |
| PFHpA <sup>a</sup>                                                                                      | -0.02 (-0.08,0.04)  | 0.01 (-0.05,0.07)   | -0.01 (-0.03,0.02)  | -0.03 (-0.09,0.03)  | -0.00 (-0.07,0.06)  | -0.01 (-0.04,0.02)  |
| PFOS <sup>a</sup>                                                                                       | 0.01 (-0.05,0.07)   | 0.01 (-0.05,0.07)   | 0.00 (-0.03,0.03)   | 0.02 (-0.04,0.08)   | 0.02 (-0.05,0.08)   | 0.00 (-0.02,0.03)   |
| PFOA <sup>a</sup>                                                                                       | -0.03 (-0.09,0.03)  | -0.01 (-0.07,0.05)  | -0.00 (-0.03,0.02)  | -0.02 (-0.08,0.04)  | 0.00 (-0.06,0.06)   | -0.00 (-0.03,0.02)  |
| PFNA <sup>a</sup>                                                                                       | 0.00 (-0.06,0.06)   | 0.02 (-0.04,0.08)   | 0.01 (-0.02,0.03)   | 0.01 (-0.05,0.07)   | 0.02 (-0.04,0.09)   | 0.01 (-0.01,0.04)   |
| PFDA <sup>a</sup>                                                                                       | 0.05 (-0.01,0.11)   | 0.02 (-0.04,0.08)   | 0.01 (-0.01,0.04)   | 0.06 (-0.01,0.12)   | 0.03 (-0.04,0.09)   | 0.02 (-0.01,0.04)   |
| PFUnDA <sup>a</sup>                                                                                     | 0.05 (-0.01,0.11)   | 0.04 (-0.02,0.10)   | 0.02 (-0.01,0.04)   | 0.06 (-0.00,0.12)   | 0.05 (-0.01,0.11)   | 0.03 (-0.00,0.05)   |
| <b>Mean differences in apoA1 (<math>\beta</math>-coefficient <math>\pm</math>95% CI, mmol/L), n=305</b> |                     |                     |                     |                     |                     |                     |
| $\Sigma$ PFAS <sup>a</sup>                                                                              | 0.08 (0.01,0.15)    | 0.14 (0.07,0.21)    | 0.02 (0.01,0.02)    | 0.07 (0.01,0.14)    | 0.11 (0.05,0.18)    | 0.01 (0.01,0.02)    |
| PFHxS <sup>a</sup>                                                                                      | -0.02 (-0.09,0.04)  | 0.06 (-0.01,0.13)   | 0.01 (-0.02,0.04)   | -0.04 (-0.11,0.03)  | 0.03 (-0.04,0.10)   | 0.01 (-0.02,0.04)   |
| PFHpA <sup>a</sup>                                                                                      | 0.02 (-0.05,0.09)   | 0.05 (-0.02,0.12)   | 0.03 (0.00,0.06)    | 0.02 (-0.05,0.08)   | 0.06 (-0.01,0.13)   | 0.03 (0.01,0.06)    |
| PFOS <sup>a</sup>                                                                                       | 0.05 (-0.02,0.12)   | 0.13 (0.06,0.20)    | 0.05 (0.02,0.08)    | 0.06 (-0.01,0.12)   | 0.11 (0.04,0.17)    | 0.04 (0.01,0.07)    |
| PFOA <sup>a</sup>                                                                                       | 0.07 (0.00,0.14)    | 0.11 (0.05,0.18)    | 0.04 (0.01,0.07)    | 0.06 (-0.00,0.13)   | 0.09 (0.03,0.16)    | 0.03 (0.00,0.06)    |
| PFNA <sup>a</sup>                                                                                       | 0.01 (-0.05,0.08)   | 0.14 (0.07,0.21)    | 0.06 (0.03,0.09)    | 0.01 (-0.06,0.07)   | 0.13 (0.07,0.20)    | 0.05 (0.02,0.08)    |
| PFDA <sup>a</sup>                                                                                       | 0.07 (0.00,0.13)    | 0.15 (0.08,0.21)    | 0.07 (0.05,0.10)    | 0.06 (-0.01,0.12)   | 0.13 (0.06,0.19)    | 0.06 (0.04,0.09)    |
| PFUnDA <sup>a</sup>                                                                                     | 0.06 (-0.01,0.12)   | 0.16 (0.10,0.23)    | 0.07 (0.04,0.09)    | 0.04 (-0.03,0.10)   | 0.14 (0.07,0.20)    | 0.06 (0.03,0.08)    |

Note: Adjusted  $\beta$ -coefficients (95% CIs) are presented according to PFAS tertiles (using tertile 1 as reference) as well as by 1-SD increment in natural log-transformed plasma PFAS concentrations (ng/mL). Model 1: Adjusted for age, sex and sampling date. Model 2: Additionally adjusted for education, BMI, diabetes, hypertension, family history of CVD, smoking habits, physical activity and healthy diet score. Individual PFAS were standardized (rescaled with mean=0 and SD=1) and summed ( $\Sigma$  PFAS).

<sup>a</sup> Estimated from the 60YO cohort alone.

Abbreviations: **PFHxS**, perfluorohexane sulfonic acid; **PFHpA**, perfluoroheptanoic acid; **PFOS**, perfluorooctane sulfonate; **PFOA**, perfluorooctanoic acid; **PFNA**, perfluorononanoic acid; **PFDA**, perfluorodecanoic acid; **PFUnDA**, perfluoroundecanoic acid.

**Table S6.** Results for interactions with BMI in multivariable-adjusted cross-sectional associations in controls between baseline PFAS plasma concentrations and total cholesterol, LDL, HDL and triglycerides of two pooled Swedish cohorts, estimated using linear mixed effects models as well as in multivariable-adjusted prospective associations between baseline PFAS plasma concentrations and cardiovascular disease (CVD) risk of two pooled Swedish cohorts, estimated using conditional logistic regression – PFHpA and PFOA results are from 60YO cohort alone.

| Estimates (95% Confidence Intervals), P-values for interactions with BMI |                           |                           |                            |                            |                          |  |
|--------------------------------------------------------------------------|---------------------------|---------------------------|----------------------------|----------------------------|--------------------------|--|
|                                                                          | Total cholesterol         | LDL                       | HDL                        | Triglycerides              | CVD                      |  |
| $\Sigma$ PFAS                                                            | 0.06 (0.02, 0.1), 0.006   | 0.05 (0.01, 0.09), 0.008  | 0.01 (-0.00, 0.03), 0.106  | -0.02 (-0.05, 0.01), 0.291 | 1.01 (0.95, 1.08), 0.736 |  |
| PFHxS                                                                    | 0.05 (-0.11, 0.21), 0.520 | 0.04 (-0.10, 0.18), 0.538 | 0.02 (-0.04, 0.07), 0.530  | -0.01 (-0.13, 0.11), 0.859 | 1.16 (0.91, 1.48), 0.236 |  |
| PFHpA <sup>a</sup>                                                       | 0.05 (-0.20, 0.30), 0.699 | 0.09 (-0.13, 0.32), 0.402 | -0.03 (-0.11, 0.05), 0.426 | 0.00 (-0.21, 0.23), 0.941  | 1.15 (0.83, 1.61), 0.404 |  |
| PFOS                                                                     | 0.22 (0.07, 0.37), 0.005  | 0.19 (0.05, 0.33), 0.007  | 0.06 (0.01, 0.11), 0.031   | -0.09 (-0.20, 0.03), 0.137 | 1.01 (0.80, 1.27), 0.924 |  |
| PFOA <sup>a</sup>                                                        | 0.25 (0.00, 0.49), 0.050  | 0.21 (-0.01, 0.43), 0.059 | 0.02 (-0.06, 0.10), 0.664  | -0.01 (-0.23, 0.21), 0.929 | 1.22 (0.88, 1.70), 0.239 |  |
| PFNA                                                                     | 0.27 (0.12, 0.43), 0.000  | 0.23 (0.09, 0.37), 0.001  | 0.07 (0.02, 0.12), 0.011   | -0.08 (-0.20, 0.04), 0.188 | 0.92 (0.73, 1.16), 0.474 |  |
| PFDA                                                                     | 0.22 (0.07, 0.37), 0.005  | 0.19 (0.05, 0.33), 0.008  | 0.05 (-0.00, 0.10), 0.057  | -0.07 (-0.19, 0.04), 0.223 | 0.95 (0.75, 1.19), 0.636 |  |
| PFUnDA                                                                   | 0.19 (0.04, 0.34), 0.016  | 0.16 (0.03, 0.3), 0.020   | 0.03 (-0.02, 0.08), 0.284  | -0.02 (-0.14, 0.09), 0.700 | 0.94 (0.74, 1.19), 0.607 |  |

Note: Estimates (95% Confidence Intervals), P-values for interactions of 1-SD increment in natural log-transformed plasma PFAS concentrations (ng/mL) with BMI are presented. Models are adjusted for matching factors (sex, age, sampling date), education, diabetes, hypertension, family history of CVD, smoking habits, physical activity and healthy diet score. Individual PFAS were standardized (rescaled with mean=0 and SD=1) and summed ( $\Sigma$  PFAS).

<sup>a</sup> Estimated from the 60YO cohort alone.

Abbreviations: **PFHxS**, perfluorohexane sulfonic acid; **PFHpA**, perfluoroheptanoic acid; **PFOS**, perfluorooctane sulfonate; **PFOA**, perfluorooctanoic acid; **PFNA**, perfluorononanoic acid; **PFDA**, perfluorodecanoic acid; **PFUnDA**, perfluoroundecanoic acid.

**Table S7.** Multivariable-adjusted prospective associations between baseline PFAS plasma concentrations and subsequent risk of cardiovascular disease (CVD), estimated in SMC-C and 60YO cohorts using conditional logistic regression – PFHpA and PFOA results are from 60YO cohort alone.

|                          | SMC-C cohort (n=742) |                     |                      |                      | 60YO cohort (n=786) |                     |                      |                      |
|--------------------------|----------------------|---------------------|----------------------|----------------------|---------------------|---------------------|----------------------|----------------------|
|                          | n ca /co             | Median (IQR)        | OR (±95% CI) Model 1 | OR (±95% CI) Model 2 | n ca /co            | Median (IQR)        | OR (±95% CI) Model 1 | OR (±95% CI) Model 2 |
| <b>∑ PFAS</b>            |                      |                     |                      |                      |                     |                     |                      |                      |
| T1                       | 116/146              | -2.91 (-3.62,-2.23) | 1.00                 | 1.00                 | 154/132             | -3.13 (-3.92,-2.42) | 1.00                 | 1.00                 |
| T2                       | 108/145              | -0.53 (-1.23,0.12)  | 0.91 (0.63,1.30)     | 1.03 (0.70,1.52)     | 145/130             | -0.58 (-1.22,0.08)  | 0.97 (0.70,1.34)     | 1.00 (0.69,1.44)     |
| T3                       | 82 /145              | 3.00 (1.73,5.12)    | 0.67 (0.46,0.97)     | 0.79 (0.52,1.19)     | 94 /131             | 3.71 (2.59,6.98)    | 0.61 (0.43,0.87)     | 0.63 (0.42,0.95)     |
| 1-SD log                 |                      |                     | 0.96 (0.92,1.00)     | 0.98 (0.93,1.02)     |                     |                     | 0.95 (0.91,0.99)     | 0.96 (0.91,1.00)     |
| <b>PFHxS</b>             |                      |                     |                      |                      |                     |                     |                      |                      |
| T1                       | 108/146              | 1.84 (1.51,2.08)    | 1.00                 | 1.00                 | 136/131             | 1.66 (1.38,1.86)    | 1.00                 | 1.00                 |
| T2                       | 113/145              | 2.74 (2.49,3.15)    | 1.05 (0.73,1.51)     | 1.11 (0.75,1.64)     | 124/131             | 2.34 (2.19,2.53)    | 0.91 (0.65,1.29)     | 0.82 (0.56,1.21)     |
| T3                       | 85 /145              | 9.61 (5.56,17.32)   | 0.76 (0.52,1.12)     | 0.88 (0.58,1.35)     | 133/131             | 3.26 (2.92,4.37)    | 0.98 (0.68,1.40)     | 1.07 (0.72,1.61)     |
| 1-SD log                 |                      |                     | 0.86 (0.73,1.00)     | 0.89 (0.75,1.06)     |                     |                     | 1.00 (0.87,1.15)     | 1.00 (0.86,1.18)     |
| <b>PFHpA<sup>a</sup></b> |                      |                     |                      |                      |                     |                     |                      |                      |
| T1                       |                      |                     |                      |                      | 153/132             | 0.03 (0.02,0.03)    | 1.00                 | 1.00                 |
| T2                       |                      |                     |                      |                      | 120/130             | 0.06 (0.05,0.07)    | 0.79 (0.56,1.12)     | 0.69 (0.46,1.03)     |
| T3                       |                      |                     |                      |                      | 120/131             | 0.12 (0.10,0.18)    | 0.78 (0.55,1.11)     | 0.75 (0.50,1.11)     |
| 1-SD log                 |                      |                     |                      |                      |                     |                     | 0.93 (0.81,1.08)     | 0.95 (0.81,1.12)     |
| <b>PFOS</b>              |                      |                     |                      |                      |                     |                     |                      |                      |
| T1                       | 111/147              | 10.88 (8.81,12.51)  | 1.00                 | 1.00                 | 139/131             | 17.17 (14.10,19.15) | 1.00                 | 1.00                 |
| T2                       | 84 /144              | 16.84 (15.40,17.97) | 0.75 (0.52,1.10)     | 0.79 (0.52,1.19)     | 144/132             | 25.37 (23.41,27.62) | 1.02 (0.73,1.43)     | 1.03 (0.71,1.50)     |
| T3                       | 111/145              | 25.01 (21.73,30.16) | 0.96 (0.66,1.39)     | 1.01 (0.67,1.51)     | 110/130             | 37.42 (33.56,44.34) | 0.77 (0.53,1.12)     | 0.81 (0.53,1.22)     |
| 1-SD log                 |                      |                     | 0.89 (0.76,1.05)     | 0.92 (0.77,1.10)     |                     |                     | 0.89 (0.76,1.03)     | 0.90 (0.76,1.07)     |
| <b>PFOA<sup>a</sup></b>  |                      |                     |                      |                      |                     |                     |                      |                      |
| T1                       |                      |                     |                      |                      | 135/131             | 3.41 (2.66,3.94)    | 1.00                 | 1.00                 |
| T2                       |                      |                     |                      |                      | 142/131             | 5.25 (4.82,5.69)    | 1.05 (0.76,1.45)     | 1.14 (0.78,1.65)     |
| T3                       |                      |                     |                      |                      | 116/131             | 7.63 (6.88,9.18)    | 0.84 (0.58,1.20)     | 0.90 (0.60,1.37)     |
| 1-SD log                 |                      |                     |                      |                      |                     |                     | 0.90 (0.77,1.04)     | 0.91 (0.77,1.08)     |
| <b>PFNA</b>              |                      |                     |                      |                      |                     |                     |                      |                      |
| T1                       | 115/147              | 0.61 (0.51,0.71)    | 1.00                 | 1.00                 | 145/132             | 0.44 (0.35,0.51)    | 1.00                 | 1.00                 |
| T2                       | 91 /145              | 0.95 (0.87,1.02)    | 0.79 (0.56,1.12)     | 0.75 (0.51,1.09)     | 143/131             | 0.72 (0.65,0.78)    | 1.00 (0.72,1.39)     | 1.01 (0.70,1.46)     |
| T3                       | 100/144              | 1.40 (1.21,1.71)    | 0.86 (0.61,1.23)     | 1.00 (0.68,1.47)     | 105/130             | 1.13 (0.98,1.43)    | 0.73 (0.51,1.04)     | 0.85 (0.57,1.27)     |
| 1-SD log                 |                      |                     | 0.91 (0.78,1.05)     | 0.95 (0.81,1.11)     |                     |                     | 0.84 (0.72,0.97)     | 0.87 (0.73,1.03)     |

| <b>PFDA</b>   |         |                  |                  |                  |         |                  |                  |                  |
|---------------|---------|------------------|------------------|------------------|---------|------------------|------------------|------------------|
| T1            | 125/152 | 0.26 (0.21,0.29) | 1.00             | 1.00             | 131/133 | 0.16 (0.12,0.19) | 1.00             | 1.00             |
| T2            | 102/140 | 0.39 (0.35,0.42) | 0.87 (0.62,1.23) | 0.99 (0.68,1.44) | 152/129 | 0.25 (0.23,0.28) | 1.18 (0.85,1.63) | 1.36 (0.94,1.98) |
| T3            | 79 /144 | 0.60 (0.52,0.74) | 0.63 (0.43,0.92) | 0.69 (0.46,1.04) | 110/131 | 0.45 (0.37,0.55) | 0.84 (0.59,1.20) | 0.99 (0.66,1.49) |
| 1-SD log      |         |                  | 0.82 (0.70,0.95) | 0.87 (0.74,1.03) |         |                  | 0.85 (0.73,0.99) | 0.91 (0.77,1.08) |
| <b>PFUnDA</b> |         |                  |                  |                  |         |                  |                  |                  |
| T1            | 143/161 | 0.19 (0.15,0.23) | 1.00             | 1.00             | 145/133 | 0.14 (0.11,0.17) | 1.00             | 1.00             |
| T2            | 78 /130 | 0.31 (0.29,0.34) | 0.68 (0.47,0.97) | 0.81 (0.55,1.20) | 158/130 | 0.24 (0.21,0.27) | 1.07 (0.77,1.50) | 1.14 (0.78,1.65) |
| T3            | 85 /145 | 0.52 (0.44,0.66) | 0.64 (0.45,0.92) | 0.81 (0.55,1.21) | 90 /130 | 0.43 (0.36,0.56) | 0.60 (0.41,0.88) | 0.73 (0.47,1.14) |
| 1-SD log      |         |                  | 0.80 (0.68,0.93) | 0.87 (0.74,1.03) |         |                  | 0.78 (0.66,0.91) | 0.84 (0.70,1.01) |

Note: Adjusted ORs (95% CIs) of incident stroke are presented according to the PFAS tertiles as well as by 1-SD increment in natural log-transformed plasma PFAS concentrations (ng/mL). Model 1: Crude model adjusted for matching factors (sex, age, sampling date). Model 2: Additionally adjusted for education, BMI, diabetes, hypertension, family history of CVD, smoking habits, physical activity and healthy diet score. Individual PFAS were standardized (rescaled with mean=0 and SD=1) and summed ( $\Sigma$  PFAS).

<sup>a</sup> Estimated from the 60YO cohort alone.

Abbreviations: **PFHxS**, perfluorohexane sulfonic acid; **PFHpA**, perfluoroheptanoic acid; **PFOS**, perfluorooctane sulfonate; **PFOA**, perfluorooctanoic acid; **PFNA**, perfluorononanoic acid; **PFDA**, perfluorodecanoic acid; **PFUnDA**, perfluoroundecanoic acid.

**Table S8.** Multivariable-adjusted prospective associations between baseline PFAS plasma concentrations and subsequent risk of myocardial infarction (MI), estimated in SMC-C and 60YO cohorts using conditional logistic regression – PFHpA and PFOA results are from 60YO cohort alone.

|                          | SMC-C cohort (n=398) |                     |                      |                      | 60YO cohort (n=422) |                     |                      |                      |
|--------------------------|----------------------|---------------------|----------------------|----------------------|---------------------|---------------------|----------------------|----------------------|
|                          | n ca /co             | Median (IQR)        | OR (±95% CI) Model 1 | OR (±95% CI) Model 2 | n ca /co            | Median (IQR)        | OR (±95% CI) Model 1 | OR (±95% CI) Model 2 |
| <b>∑ PFAS</b>            |                      |                     |                      |                      |                     |                     |                      |                      |
| T1                       | 61 /93               | -2.95 (-3.85,-2.25) | 1.00                 | 1.00                 | 80 /74              | -3.02 (-3.82,-2.32) | 1.00                 | 1.00                 |
| T2                       | 44 /85               | -0.49 (-1.22,0.17)  | 0.82 (0.49,1.37)     | 0.91 (0.51,1.61)     | 84 /70              | -0.58 (-1.26,0.08)  | 1.10 (0.71,1.70)     | 1.13 (0.67,1.91)     |
| T3                       | 29 /86               | 2.80 (1.83,4.92)    | 0.52 (0.31,0.89)     | 0.56 (0.31,1.00)     | 47 /67              | 3.73 (2.40,6.48)    | 0.60 (0.36,1.01)     | 0.65 (0.34,1.22)     |
| 1-SD log                 |                      |                     | 0.91 (0.85,0.97)     | 0.91 (0.85,0.98)     |                     |                     | 0.94 (0.89,1.00)     | 0.96 (0.89,1.03)     |
| <b>PFHxS</b>             |                      |                     |                      |                      |                     |                     |                      |                      |
| T1                       | 52 /88               | 1.77 (1.48,2.05)    | 1.00                 | 1.00                 | 64 /68              | 1.68 (1.43,1.87)    | 1.00                 | 1.00                 |
| T2                       | 54 /86               | 2.74 (2.50,3.14)    | 1.05 (0.64,1.74)     | 1.14 (0.66,1.99)     | 70 /74              | 2.34 (2.19,2.52)    | 1.02 (0.64,1.63)     | 0.92 (0.52,1.60)     |
| T3                       | 28 /90               | 10.71 (5.89,17.88)  | 0.51 (0.29,0.91)     | 0.54 (0.28,1.03)     | 77 /69              | 3.22 (2.92,4.49)    | 1.21 (0.74,1.99)     | 1.45 (0.78,2.70)     |
| 1-SD log                 |                      |                     | 0.74 (0.59,0.93)     | 0.74 (0.58,0.95)     |                     |                     | 1.07 (0.86,1.33)     | 1.05 (0.80,1.38)     |
| <b>PFHpA<sup>a</sup></b> |                      |                     |                      |                      |                     |                     |                      |                      |
| T1                       |                      |                     |                      |                      | 89 /67              | 0.03 (0.02,0.03)    | 1.00                 | 1.00                 |
| T2                       |                      |                     |                      |                      | 62 /78              | 0.06 (0.05,0.07)    | 0.60 (0.38,0.95)     | 0.49 (0.27,0.89)     |
| T3                       |                      |                     |                      |                      | 60 /66              | 0.13 (0.10,0.18)    | 0.68 (0.42,1.10)     | 0.61 (0.33,1.12)     |
| 1-SD log                 |                      |                     |                      |                      |                     |                     | 0.86 (0.71,1.06)     | 0.86 (0.66,1.10)     |
| <b>PFOS</b>              |                      |                     |                      |                      |                     |                     |                      |                      |
| T1                       | 58 /89               | 10.61 (8.13,12.49)  | 1.00                 | 1.00                 | 66 /71              | 17.26 (14.60,19.19) | 1.00                 | 1.00                 |
| T2                       | 39 /84               | 17.09 (15.97,18.21) | 0.74 (0.45,1.21)     | 0.71 (0.41,1.23)     | 83 /75              | 25.23 (23.80,27.48) | 1.19 (0.75,1.88)     | 1.27 (0.72,2.22)     |
| T3                       | 37 /91               | 24.30 (21.70,29.14) | 0.60 (0.35,1.03)     | 0.55 (0.31,0.99)     | 62 /65              | 37.01 (33.46,45.12) | 1.01 (0.60,1.71)     | 1.21 (0.64,2.29)     |
| 1-SD log                 |                      |                     | 0.77 (0.61,0.96)     | 0.74 (0.58,0.95)     |                     |                     | 0.91 (0.73,1.14)     | 0.96 (0.73,1.26)     |
| <b>PFOA<sup>a</sup></b>  |                      |                     |                      |                      |                     |                     |                      |                      |
| T1                       |                      |                     |                      |                      | 69 /69              | 3.46 (2.79,3.92)    | 1.00                 | 1.00                 |
| T2                       |                      |                     |                      |                      | 84 /74              | 5.27 (4.81,5.72)    | 1.12 (0.73,1.72)     | 1.35 (0.79,2.32)     |
| T3                       |                      |                     |                      |                      | 58 /68              | 7.73 (6.92,9.54)    | 0.81 (0.49,1.35)     | 1.12 (0.59,2.14)     |
| 1-SD log                 |                      |                     |                      |                      |                     |                     | 0.90 (0.73,1.12)     | 1.00 (0.75,1.33)     |
| <b>PFNA</b>              |                      |                     |                      |                      |                     |                     |                      |                      |
| T1                       | 57 /91               | 0.59 (0.50,0.69)    | 1.00                 | 1.00                 | 71 /71              | 0.43 (0.35,0.52)    | 1.00                 | 1.00                 |
| T2                       | 42 /81               | 0.93 (0.86,1.02)    | 0.83 (0.51,1.35)     | 0.78 (0.46,1.32)     | 89 /74              | 0.71 (0.65,0.78)    | 1.20 (0.78,1.86)     | 1.16 (0.69,1.96)     |
| T3                       | 35 /92               | 1.35 (1.20,1.64)    | 0.62 (0.38,1.02)     | 0.69 (0.40,1.19)     | 51 /66              | 1.13 (0.98,1.44)    | 0.76 (0.47,1.24)     | 0.89 (0.49,1.62)     |
| 1-SD log                 |                      |                     | 0.78 (0.64,0.95)     | 0.79 (0.63,0.99)     |                     |                     | 0.84 (0.69,1.03)     | 0.90 (0.69,1.16)     |

| <b>PFDA</b>   |         |                  |                  |                  |        |                  |                  |                  |
|---------------|---------|------------------|------------------|------------------|--------|------------------|------------------|------------------|
| T1            | 61 /94  | 0.25 (0.20,0.29) | 1.00             | 1.00             | 68 /73 | 0.16 (0.12,0.19) | 1.00             | 1.00             |
| T2            | 40 /89  | 0.38 (0.35,0.42) | 0.71 (0.43,1.17) | 0.80 (0.46,1.37) | 86 /70 | 0.25 (0.23,0.28) | 1.28 (0.83,1.98) | 1.57 (0.92,2.67) |
| T3            | 33 /81  | 0.59 (0.51,0.74) | 0.64 (0.39,1.07) | 0.68 (0.38,1.19) | 57 /68 | 0.45 (0.36,0.54) | 0.85 (0.52,1.41) | 1.14 (0.60,2.16) |
| 1-SD log      |         |                  | 0.73 (0.59,0.91) | 0.75 (0.60,0.95) |        |                  | 0.84 (0.68,1.04) | 0.98 (0.74,1.28) |
| <b>PFUnDA</b> |         |                  |                  |                  |        |                  |                  |                  |
| T1            | 68 /103 | 0.18 (0.14,0.22) | 1.00             | 1.00             | 82 /71 | 0.14 (0.12,0.17) | 1.00             | 1.00             |
| T2            | 37 /74  | 0.32 (0.29,0.35) | 0.77 (0.46,1.28) | 0.91 (0.52,1.60) | 87 /74 | 0.24 (0.22,0.27) | 0.97 (0.63,1.49) | 1.09 (0.64,1.86) |
| T3            | 29 /87  | 0.50 (0.43,0.62) | 0.52 (0.31,0.87) | 0.62 (0.35,1.10) | 42 /66 | 0.44 (0.36,0.56) | 0.50 (0.29,0.86) | 0.68 (0.34,1.34) |
| 1-SD log      |         |                  | 0.74 (0.60,0.92) | 0.76 (0.60,0.96) |        |                  | 0.76 (0.60,0.95) | 0.87 (0.65,1.15) |

Note: Adjusted ORs (95% CIs) of incident MI are presented according to the PFAS tertiles as well as by 1-SD increment in natural log-transformed plasma PFAS concentrations (ng/mL). Model 1: Crude model adjusted for matching factors (sex, age, sampling date). Model 2: Additionally adjusted for education, BMI, diabetes, hypertension, family history of CVD, smoking habits, physical activity and healthy diet score. Individual PFAS were standardized (rescaled with mean=0 and SD=1) and summed ( $\Sigma$  PFAS).

<sup>a</sup> Estimated from the 60YO cohort alone.

Abbreviations: **PFHxS**, perfluorohexane sulfonic acid; **PFHpA**, perfluoroheptanoic acid; **PFOS**, perfluorooctane sulfonate; **PFOA**, perfluorooctanoic acid; **PFNA**, perfluorononanoic acid; **PFDA**, perfluorodecanoic acid; **PFUnDA**, perfluoroundecanoic acid.

**Table S9.** Multivariable-adjusted prospective associations between baseline PFAS plasma concentrations and subsequent risk of stroke, estimated in SMC-C and 60YO cohorts using conditional logistic regression – PFHpA and PFOA results are from 60YO cohort alone.

|                                 | SMC-C cohort (n=344) |                     |                            |                            | 60YO cohort (n=364) |                     |                            |                            |
|---------------------------------|----------------------|---------------------|----------------------------|----------------------------|---------------------|---------------------|----------------------------|----------------------------|
|                                 | n ca /co             | Median (IQR)        | OR ( $\pm$ 95% CI) Model 1 | OR ( $\pm$ 95% CI) Model 2 | n ca /co            | Median (IQR)        | OR ( $\pm$ 95% CI) Model 1 | OR ( $\pm$ 95% CI) Model 2 |
| <b><math>\Sigma</math> PFAS</b> |                      |                     |                            |                            |                     |                     |                            |                            |
| Tertile 1                       | 55 /53               | -2.89 (-3.43,-2.23) | 1.00                       | 1.00                       | 74 /58              | -3.23 (-4.01,-2.60) | 1.00                       | 1.00                       |
| Tertile 2                       | 64 /60               | -0.61 (-1.30,0.11)  | 1.03 (0.63,1.69)           | 1.11 (0.63,1.94)           | 61 /60              | -0.49 (-1.19,0.09)  | 0.81 (0.49,1.33)           | 0.78 (0.44,1.38)           |
| Tertile 3                       | 53 /59               | 3.33 (1.71,5.37)    | 0.86 (0.51,1.46)           | 1.14 (0.62,2.11)           | 47 /64              | 3.71 (2.69,7.05)    | 0.60 (0.36,0.98)           | 0.62 (0.36,1.08)           |
| 1-SD log                        |                      |                     | 0.99 (0.94,1.05)           | 1.03 (0.97,1.10)           |                     |                     | 0.95 (0.90,1.00)           | 0.96 (0.90,1.02)           |
| <b>PFHxS</b>                    |                      |                     |                            |                            |                     |                     |                            |                            |
| Tertile 1                       | 56 /58               | 1.94 (1.52,2.12)    | 1.00                       | 1.00                       | 72 /63              | 1.65 (1.33,1.84)    | 1.00                       | 1.00                       |
| Tertile 2                       | 59 /59               | 2.76 (2.46,3.16)    | 1.04 (0.61,1.77)           | 1.09 (0.62,1.93)           | 54 /57              | 2.34 (2.20,2.55)    | 0.82 (0.49,1.37)           | 0.75 (0.42,1.34)           |
| Tertile 3                       | 57 /55               | 8.90 (5.51,17.18)   | 1.08 (0.63,1.84)           | 1.27 (0.70,2.31)           | 56 /62              | 3.30 (2.91,4.13)    | 0.77 (0.46,1.30)           | 0.79 (0.44,1.42)           |
| 1-SD log                        |                      |                     | 1.00 (0.80,1.26)           | 1.08 (0.84,1.39)           |                     |                     | 0.95 (0.79,1.15)           | 0.99 (0.81,1.20)           |
| <b>PFHpA<sup>a</sup></b>        |                      |                     |                            |                            |                     |                     |                            |                            |
| Tertile 1                       |                      |                     |                            |                            | 64 /65              | 0.03 (0.02,0.03)    | 1.00                       | 1.00                       |
| Tertile 2                       |                      |                     |                            |                            | 58 /52              | 0.06 (0.05,0.07)    | 1.14 (0.67,1.93)           | 1.03 (0.55,1.90)           |
| Tertile 3                       |                      |                     |                            |                            | 60 /65              | 0.12 (0.10,0.17)    | 0.94 (0.57,1.56)           | 0.89 (0.50,1.57)           |
| 1-SD log                        |                      |                     |                            |                            |                     |                     | 1.02 (0.82,1.25)           | 1.05 (0.83,1.33)           |
| <b>PFOS</b>                     |                      |                     |                            |                            |                     |                     |                            |                            |
| Tertile 1                       | 53 /58               | 11.05 (8.84,12.54)  | 1.00                       | 1.00                       | 73 /60              | 16.75 (13.78,19.10) | 1.00                       | 1.00                       |
| Tertile 2                       | 45 /60               | 16.44 (15.26,17.84) | 0.87 (0.48,1.55)           | 0.98 (0.50,1.92)           | 61 /57              | 25.61 (23.14,27.99) | 0.86 (0.52,1.41)           | 0.85 (0.49,1.48)           |
| Tertile 3                       | 74 /54               | 25.52 (21.93,30.69) | 1.51 (0.87,2.64)           | 1.97 (1.03,3.76)           | 48 /65              | 37.58 (33.58,44.05) | 0.59 (0.35,1.00)           | 0.59 (0.33,1.06)           |
| 1-SD log                        |                      |                     | 1.06 (0.84,1.35)           | 1.20 (0.92,1.57)           |                     |                     | 0.87 (0.71,1.07)           | 0.87 (0.69,1.10)           |
| <b>PFOA<sup>a</sup></b>         |                      |                     |                            |                            |                     |                     |                            |                            |
| Tertile 1                       |                      |                     |                            |                            | 66 /62              | 3.35 (2.61,3.96)    | 1.00                       | 1.00                       |
| Tertile 2                       |                      |                     |                            |                            | 58 /57              | 5.22 (4.82,5.67)    | 0.96 (0.58,1.58)           | 1.04 (0.59,1.85)           |
| Tertile 3                       |                      |                     |                            |                            | 58 /63              | 7.52 (6.86,8.89)    | 0.86 (0.51,1.43)           | 0.82 (0.46,1.46)           |
| 1-SD log                        |                      |                     |                            |                            |                     |                     | 0.89 (0.73,1.09)           | 0.89 (0.71,1.11)           |
| <b>PFNA</b>                     |                      |                     |                            |                            |                     |                     |                            |                            |
| Tertile 1                       | 58 /56               | 0.62 (0.53,0.71)    | 1.00                       | 1.00                       | 74 /61              | 0.44 (0.36,0.51)    | 1.00                       | 1.00                       |
| Tertile 2                       | 49 /64               | 0.95 (0.87,1.02)    | 0.77 (0.47,1.25)           | 0.67 (0.39,1.16)           | 54 /57              | 0.72 (0.66,0.79)    | 0.78 (0.47,1.29)           | 0.80 (0.46,1.41)           |
| Tertile 3                       | 65 /52               | 1.43 (1.25,1.81)    | 1.26 (0.75,2.12)           | 1.56 (0.87,2.80)           | 54 /64              | 1.13 (0.98,1.37)    | 0.69 (0.42,1.14)           | 0.80 (0.45,1.43)           |
| 1-SD log                        |                      |                     | 1.11 (0.88,1.40)           | 1.21 (0.94,1.57)           |                     |                     | 0.83 (0.68,1.02)           | 0.84 (0.66,1.06)           |

|               |        |                  |                  |                  |        |                  |                  |                  |
|---------------|--------|------------------|------------------|------------------|--------|------------------|------------------|------------------|
| <b>PFDA</b>   |        |                  |                  |                  |        |                  |                  |                  |
| Tertile 1     | 64 /58 | 0.27 (0.24,0.29) | 1.00             | 1.00             | 63 /60 | 0.16 (0.12,0.19) | 1.00             | 1.00             |
| Tertile 2     | 62 /51 | 0.39 (0.36,0.42) | 1.05 (0.64,1.73) | 1.22 (0.71,2.10) | 66 /59 | 0.26 (0.23,0.28) | 1.05 (0.64,1.72) | 1.10 (0.62,1.96) |
| Tertile 3     | 46 /63 | 0.61 (0.53,0.74) | 0.63 (0.36,1.10) | 0.73 (0.39,1.36) | 53 /63 | 0.45 (0.38,0.56) | 0.81 (0.49,1.35) | 0.92 (0.51,1.64) |
| 1-SD log      |        |                  | 0.92 (0.74,1.15) | 1.05 (0.82,1.35) |        |                  | 0.86 (0.70,1.06) | 0.88 (0.69,1.11) |
| <b>PFUnDA</b> |        |                  |                  |                  |        |                  |                  |                  |
| Tertile 1     | 75 /58 | 0.19 (0.16,0.23) | 1.00             | 1.00             | 63 /62 | 0.14 (0.10,0.16) | 1.00             | 1.00             |
| Tertile 2     | 41 /56 | 0.31 (0.28,0.34) | 0.58 (0.34,0.99) | 0.68 (0.38,1.21) | 71 /56 | 0.24 (0.21,0.27) | 1.24 (0.74,2.08) | 1.31 (0.73,2.36) |
| Tertile 3     | 56 /58 | 0.54 (0.45,0.69) | 0.80 (0.48,1.33) | 1.07 (0.59,1.91) | 48 /64 | 0.42 (0.36,0.54) | 0.72 (0.42,1.25) | 0.80 (0.43,1.50) |
| 1-SD log      |        |                  | 0.86 (0.69,1.07) | 1.01 (0.78,1.31) |        |                  | 0.80 (0.64,0.99) | 0.82 (0.64,1.05) |

Note: Adjusted ORs (95% CIs) of incident stroke are presented according to the PFAS tertiles (using tertile 1 as reference) as well as by 1-SD increment in natural log-transformed plasma PFAS concentrations (ng/mL). Model 1: Crude model adjusted for matching factors (sex, age, sampling date). Model 2: Additionally adjusted for education, BMI, diabetes, hypertension, family history of CVD, smoking habits, physical activity and healthy diet score. Individual PFAS were standardized (rescaled with mean=0 and SD=1) and summed ( $\Sigma$  PFAS).

<sup>a</sup> Estimated from the 60YO cohort alone.

Abbreviations: **PFHxS**, perfluorohexane sulfonic acid; **PFHpA**, perfluoroheptanoic acid; **PFOS**, perfluorooctane sulfonate; **PFOA**, perfluorooctanoic acid; **PFNA**, perfluorononanoic acid; **PFDA**, perfluorodecanoic acid; **PFUnDA**, perfluoroundecanoic acid.



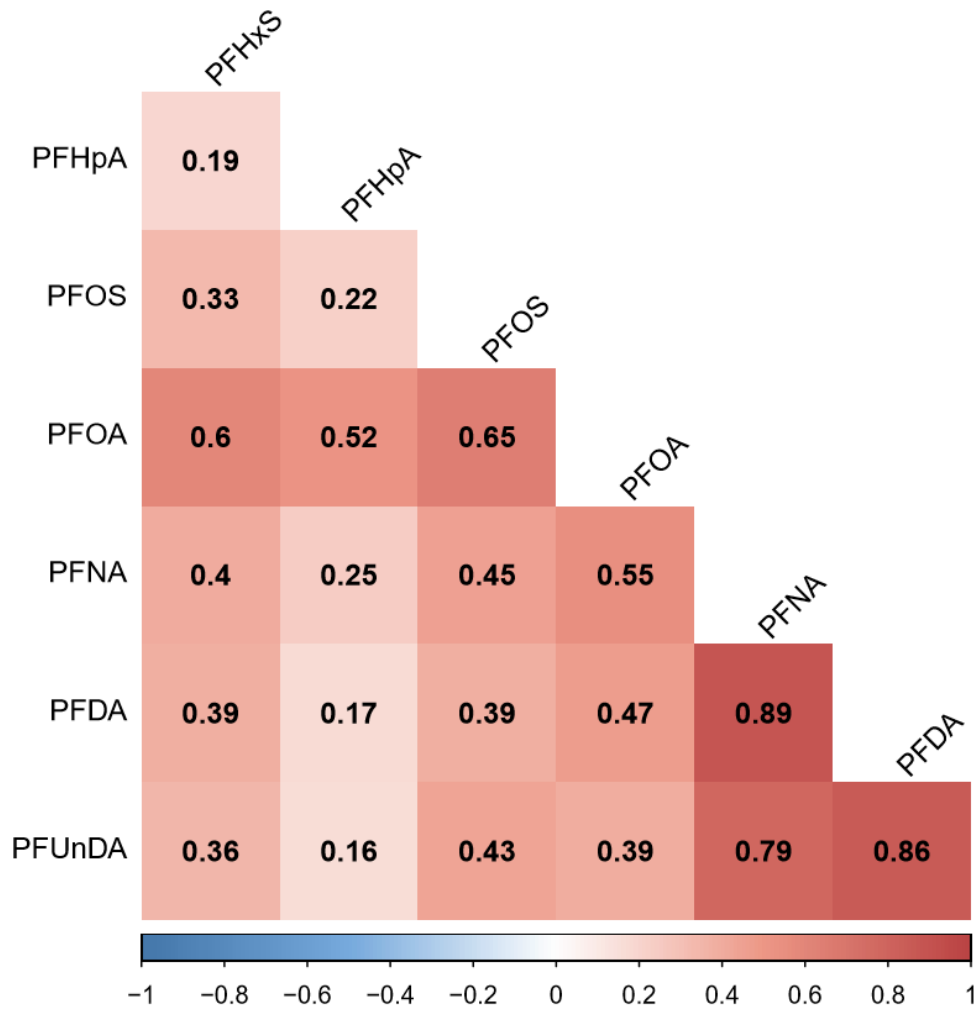

**Figure S1.** Pairwise Spearman's rank correlations between different PFAS at baseline using both cohorts (SMC-C and 60YO), except for PFHpA and PFOA which were derived using the 60YO cohort alone. Abbreviations: **PFHxS**, perfluorohexane sulfonic acid; **PFHpA**, perfluoroheptanoic acid; **PFOS**, perfluorooctane sulfonate; **PFOA**, perfluorooctanoic acid; **PFNA**, perfluorononanoic acid; **PFDA**, perfluorodecanoic acid; **PFUnDA**, perfluoroundecanoic acid.

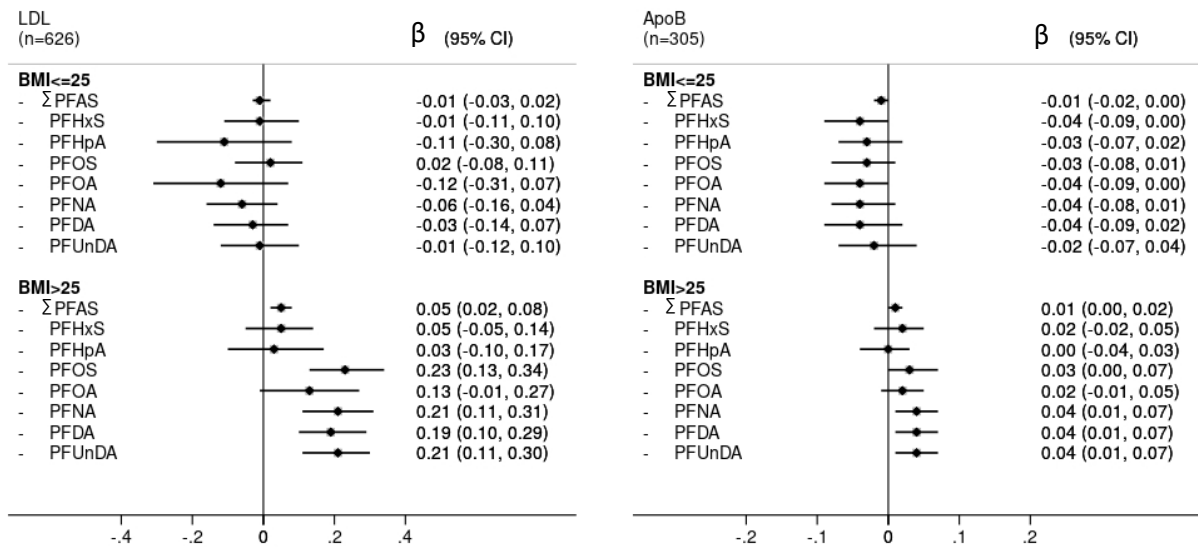

**Figure S2.** Multivariable-adjusted cross-sectional associations in controls of two Swedish pooled cohorts (SMC-C baseline: 2003-2009 and 60YO baseline: 1997-1999) between baseline PFAS plasma concentrations and a) LDL in pooled cohorts, estimated using linear mixed effects models stratified by BMI (lean: n=253, overweight: n=373) and b) apoB in the 60YO, estimated using a linear regression stratified by BMI (lean: n=105, overweight: n=200). PFHpA and PFOA are from 60YO cohort alone. Adjusted  $\beta$ -coefficients ( $\pm 95\%$  CIs, mmol/L) of blood lipids are presented by 1-SD increment in natural log-transformed plasma PFAS concentrations (ng/mL). Models are adjusted for age, sex, sampling date, education, diabetes, hypertension, family history of CVD, smoking habits, physical activity and healthy diet score. Individual PFAS were standardized (rescaled with mean=0 and SD=1) and summed ( $\Sigma$  PFAS). PFHpA and PFOA which were derived using the 60YO cohort alone. Abbreviations: **PFOS**, perfluorooctane sulfonate; **PFNA**, perfluorononanoic acid; **PFDA**, perfluorodecanoic acid; **PFUnDA**, perfluoroundecanoic acid.

**Appendix S1.** Certificate quality control PFAS measurements (University of Erlangen-Nuremberg, Germany).

**Prof. Dr. med. H. Drexler**  
**Institute and Outpatient Clinic for Occupational, Social and Environmental Medicine of**  
**the University of Erlangen-Nuremberg**  
**Henkestr. 9-11, D-91054 Erlangen**

Intercomparison programme 64, 2019 for toxicological analyses in biological materials

Inst. for Arbeta-, Social- and Umweltsyddin, Henkestr. 9-11, 91054 Erlangen

Arbets- och miljömedicin Syd, v 3  
 Medicin Village, Byggn 402A  
 Scheelevägen 8  
 22185 Lund  
 Sweden

**Labor: 336**

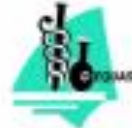

Erlangen, 2020/01/28

### Youden Plot

| No. | parameter     | evaluation   | your results | ref. value   | tolerance range            | unit         |
|-----|---------------|--------------|--------------|--------------|----------------------------|--------------|
| 120 | PFOA in serum | A: +<br>B: + | 0.75<br>7.58 | 0.81<br>7.91 | 0.63 - 0.99<br>6.83 - 8.99 | µg/l<br>µg/l |

PFOA in serum (Environmental medical field)

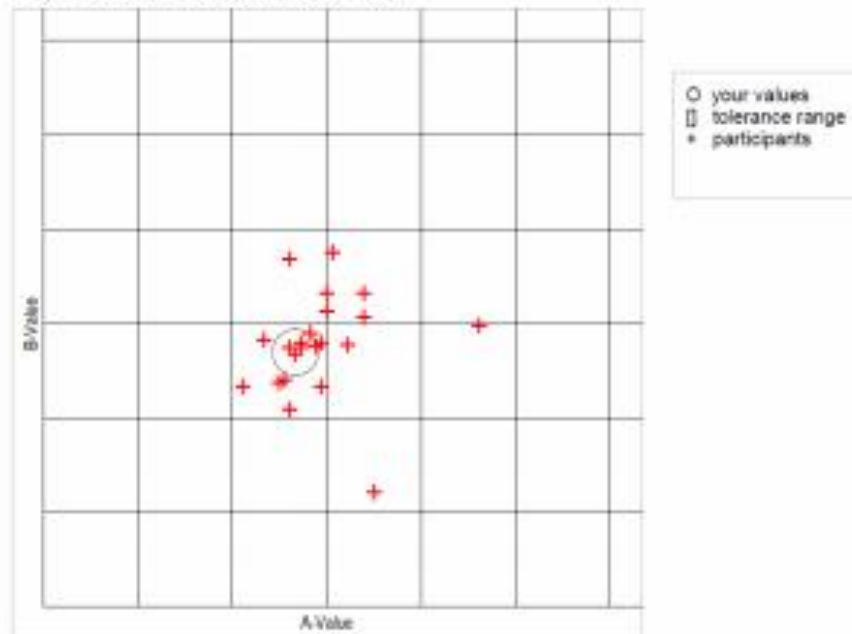

|                                           |          |                  |
|-------------------------------------------|----------|------------------|
| number of participants                    | <b>A</b> | <b>B</b>         |
| within 3-fold tolerance range             | 24       | 24               |
| mean of 3-fold tolerance range            | 0.82     | 7.68             |
| standard deviation 3-fold tolerance range | 0.09     | 0.58             |
| both values within tolerance range        |          | 20 Labs; (83.3%) |

**Prof. Dr. med. H. Drexler**  
**Institute and Outpatient Clinic for Occupational, Social and Environmental Medicine of**  
**the University of Erlangen-Nuremberg**  
**Henkestr. 9-11, D-91054 Erlangen**

Intercomparison programme 64, 2019 for toxicological analyses in biological materials

Inst. für Arbeits-, Sozial- und Umweltmedizin, Henkestr. 9-11, 91054 Erlangen

Arbets- och miljömedicin Syd, v 3  
 Medicon Village, Byggn 402A  
 Scheelevägen 8  
 22185 Lund  
 Sweden

Labor: 336

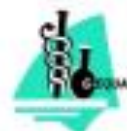

Erlangen, 2020/01/28

## Youden Plot

| No. | parameter     | evaluation   | your results  | ref. value    | tolerance range              | unit         |
|-----|---------------|--------------|---------------|---------------|------------------------------|--------------|
| 121 | PFOS in serum | A: +<br>B: + | 1.42<br>14.43 | 1.34<br>14.15 | 0.98 - 1.70<br>10.97 - 17.33 | µg/l<br>µg/l |

PFOS in serum (Environmental medical field)

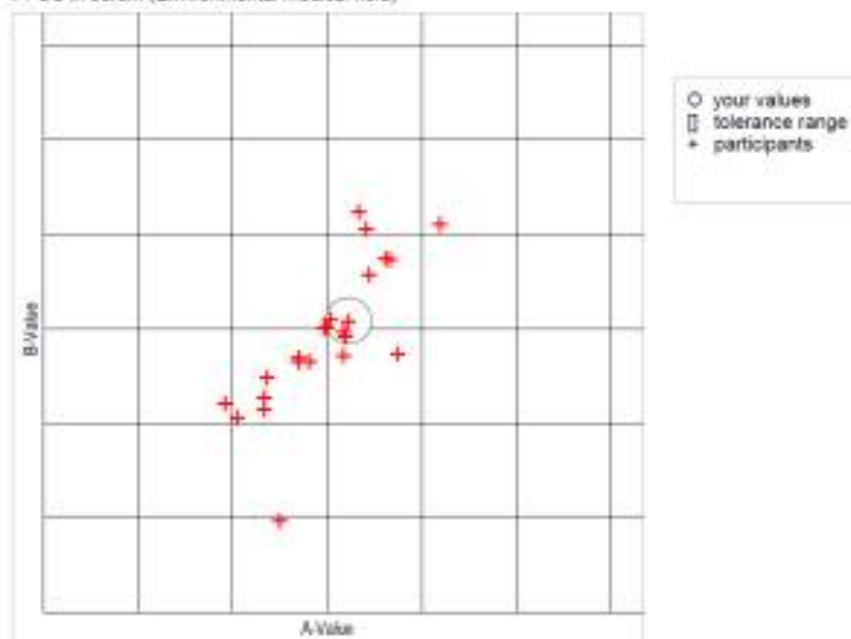

|                                           | <b>A</b> | <b>B</b>         |
|-------------------------------------------|----------|------------------|
| number of participants                    | 24       | 24               |
| within 3-fold tolerance range             | 24       | 23               |
| mean of 3-fold tolerance range            | 1.33     | 13.94            |
| standard deviation 3-fold tolerance range | 0.20     | 2.37             |
| both values within tolerance range        |          | 18 Labs; (75.0%) |

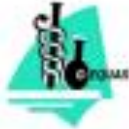

German External Quality Assessment Scheme

**Intercomparison programme 64, 2019  
for toxicological analyses in biological materials**

**Prof. Dr. med. H. Drexler**

on behalf of the German Society for Occupational and Environmental Medicine e.V

Henkestr. 9-11, D-91054 Erlangen

External Quality Control acc. to the Guidelines of the German Federal Medical Council

Teilnehmer: Arbets- och miljömedicin Syd, v 3  
Medicon Village, Byggn 402A  
Scheelevägen 8  
22185 Lund  
Sweden

336

## Certificate

valid until January 31, 2021

This is to certify you participated in the intercomparison programme 64 / 2019 for occupational / environmental medical - toxicological analyses. In accordance with the guidelines issued by the German Federal Medical Council (Bundesärztekammer) of September 19th, 2014 on implementation of intercomparison programmes in the medical field you have fulfilled the requirements for the following parameters:

### Environmental medical field

Pb in blood  
Cd in urine  
Pb in urine  
Cotinine in urine  
MEHP in urine  
MBzP in urine  
Sr in urine  
Mo in urine  
Benzophenone-3 in urine

Cd in blood  
Ni in urine  
1-HP in urine  
5-OH-MEHP in urine  
PFOA in serum  
As total in urine  
Zn in urine  
TCS in urine

Hg in blood  
Hg in urine  
3-PBA in urine  
5-carboxy-MEPP in urine  
PFOS in serum  
Cu in urine  
Trichloropyridinol in urine  
Glyphosat in urine

Erlangen, 2020/01/28

Prof. Dr. med. H. Drexler

Prof. Dr. rer. nat. Th. Göen

**Appendix S2.** Certificate quality control PFAS measurements (HBM4EU).

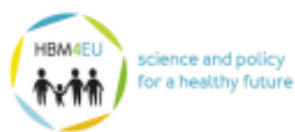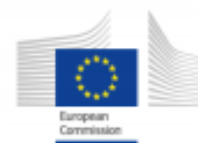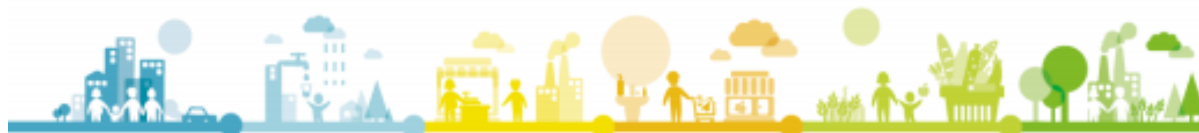

## CERTIFICATE OF PARTICIPATION

This is to certify that

***Occupational and environmental medicine. Laboratory medicine***

has participated in the HBM4EU QA/QC programme and its successful performance has resulted in its qualification as HBM4EU laboratory for the analysis of:

***PFPeA, PFHpA, PFOA, PFNA, PFDA, PFUnDA, PFDoDA, PFBS, PFHxS, PFHpS and PFOS in human serum***

Institute and Outpatient Clinic of Occupational,  
Social and Environmental Medicine (IPASUM)

Organiser of the per- and polyfluoroalkyl  
substances (PFAS) exercise

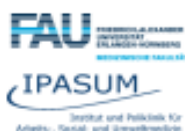

Argelia Castaño  
Marta Esteban López

Thomas Göen

WP9 leaders

Task 9.4 leader

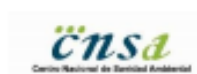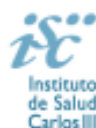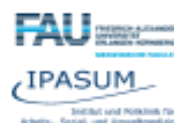

On behalf of the  
HBM4EU Quality Assurance Unit
